# Supplementary material for: Polar mesospheric clouds observed by Himawari-8
Source: Copernicus journal article supplement (doi:10.5194/amt-2018-120), 2018-06-05
Supplement: Supplementary file [file amt-2018-120-RC1-supplement.pdf]

## **Review of Tsuda et al., “Polar mesospheric clouds observed by Himawari-8”**

This paper introduced a new satellite measurement of PMCs from Himawari-8, a limb viewing sensor on a geostationary satellite. It demonstrates clearly that the clouds seen are PMCs, depending on its altitudes (80-82 km), and seasonality in both northern and southern polar regions. It is a valid measurement paper and fairly well written. I recommend its publication at AMT with minor revisions.

Overall, there are a number of grammar mistakes throughout the manuscript.

Minor comments:

Page 1:

Line 3: “evidence”

Line 4: which 3 visible bands?

Line 5: suggest “contribute to the PMC research”

Line 14: suggest “CO<sub>2</sub> cooling increase and more H<sub>2</sub>O”

Line 19: remove “from” after limb-reviewing

Line 20: suggest “a GEO satellite”

Page 2: line 5: replace “by” with “from”

Page 3: line 1: “details”

Line 5: “this kind of”

Line 9: one tenth of the wavelength of what?

Line 10: This part of discussion is not clear. shorter wavelength light has stronger Mie scattering. Check the design of AIM CIPS and SOFIE.

Line 15: what’s relation between total counts and emission intensities? Linear?

Line 23: define “sun-induced noise”

Figure 2: “at 21:00 UT”
